1 **Drone-derived canopy height predicts biomass across non-forest**  
2 **ecosystems globally**

3

4 **Contributors**

5 Cunliffe, A.M.(1), Anderson, K.(2), Boschetti, F.(1), Brazier, R.E.(1), Graham, H.A.(1),  
6 Myers-Smith, I.H.(3), Astor, T.(4), Boer, M.M.(5), Calvo, L.(6), Clark, P.E.(7), Cramer,  
7 M.D.(8), Encinas-Lara, M.S.(9), Escarzaga, S.M.(10), Fernández-Guisuraga, J.M.(6), Fisher,  
8 A.G.(11), Gdulová, K.(12), Gillespie, B.M.(13), Griebel, A.(5), Hanan, N.P.(14), Hanggito,  
9 M.S.(10), Haselberger, S.(15), Havrilla, C.A.(16), Heilman, P.(17), Ji, W.(14), Karl, J.W.(18),  
10 Kirchhoff, M.(19), Kraushaar, S.(15), Lyons, M.B.(20), Marzloff, I.(21), Mauritz, M.E.(10),  
11 McIntire, C.D.(22), Metzen, D.(5), Méndez-Barroso, L.A.(9), Power, S.C.(8), Prošek, J.(12),  
12 Sanz-Ablanedo, E.(23), Sauer, K.J.(24), Schulze-Brüninghoff, D.(4), Šímová, P.(12), Sitch,  
13 S.(1), Smit, J.L.(25), Steele, C.M.(14), Suárez-Seoane, S.(26), Vargas, S.A.(10), Villarreal,  
14 M.L.(27), Visser, F.(28), Wachendorf, M.(4), Wirnsberger, H.(15), Wojcikiewicz, R.(14)

## 15 **Affiliations**

16 1: Department of Geography, College of Life and Environmental Sciences, University of  
17 Exeter, Exeter, UK; 2: Environment and Sustainability Institute, University of Exeter, Penryn,  
18 UK; 3: School of GeoSciences, University of Edinburgh, UK; 4: Grassland Science and  
19 Renewable Plant Resources, Organic Agricultural Sciences, Universität Kassel, D-37213  
20 Witzenhausen, Germany; 5: Hawkesbury Institute for the Environment, Western Sydney  
21 University, Penrith, Australia; 6: Biodiversity and Environmental Management Department,  
22 Faculty of Biological and Environmental Sciences, University of León, León, Spain; 7:  
23 Northwest Watershed Research Center, USDA Agricultural Research Service, Boise, Idaho,  
24 USA; 8: Department of Biological Sciences, University of Cape Town, Cape Town, South  
25 Africa; 9: Department of Environmental and Water Sciences, Instituto Tecnológico de  
26 Sonora, Ciudad Obregón, Sonora, Mexico; 10: University of Texas at El Paso, El Paso,  
27 Texas, USA; 11: Joint Remote Sensing Research Program, School of Earth and  
28 Environmental Sciences, University of Queensland, Brisbane, QLD, 4072, Australia; 12:  
29 Faculty of Environmental Sciences, Czech University of Life Sciences Prague, Kamýcká  
30 129, Praha - Suchbát, 165 00, Czechia; 13: Biology Department, San Diego State University,  
31 San Diego, California, USA; 14: New Mexico State University, Las Cruces, New Mexico,  
32 USA; 15: Department of Geography and Regional Research, University of Vienna, Vienna,  
33 Austria; 16: Northern Arizona University, Arizona, USA; 17: USDA-Agricultural Research  
34 Service, Southwest Watershed Research Center, Tucson, AZ, USA; 18: University of Idaho,  
35 Department of Forest, Rangeland, and Fire Sciences, Idaho, USA; 19: Department of  
36 Physical Geography, Trier University, Germany; 20: School of Biological, Earth and  
37 Environmental Sciences, University of New South Wales, Australia; 21: Department of  
38 Physical Geography, Goethe University Frankfurt am Main, Germany; 22: Biology, University  
39 of New Mexico, Albuquerque, New Mexico, USA; 23: Grupo de Investigación en Geomática  
40 e Ingeniería Cartográfica (GEOINCA), University of León, Ponferrada, Spain; 24:  
41 Department of Natural Resources, Sul Ross State University, Alpine, Texas, USA; 25:  
42 Geomatics Division, School of Architecture, Planning and Geomatics, University of Cape  
43 Town, Cape Town, South Africa; 26: Department of Organisms and Systems Biology  
44 (Ecology Unit) and Research Unit of Biodiversity (UO-CSIC-PA), University of Oviedo,  
45 Oviedo, Mieres, Spain; 27: U.S. Geological Survey, Western Geographic Science Center,  
46 Moffett Field, CA 94035, USA; 28: School of Science and the Environment, University of  
47 Worcester, Worcester, UK.

48 \*correspondence to [a.cunliffe@exeter.ac.uk](mailto:a.cunliffe@exeter.ac.uk)

49 **Abstract**

50 Non-forest ecosystems, dominated by shrubs, grasses and herbaceous plants, provide  
51 ecosystem services including carbon sequestration and forage for grazing, yet are highly  
52 sensitive to climatic changes. Yet these ecosystems are poorly represented in remotely-  
53 sensed biomass products and are undersampled by *in-situ* monitoring. Current global  
54 change threats emphasise the need for new tools to capture biomass change in non-forest  
55 ecosystems at appropriate scales. Here we assess whether canopy height inferred from  
56 drone photogrammetry allows the estimation of aboveground biomass (AGB) across low-  
57 stature plant species sampled through a global site network. We found mean canopy height  
58 is strongly predictive of AGB across species, demonstrating standardised photogrammetric  
59 approaches are generalisable across growth forms and environmental settings. Biomass  
60 per-unit-of-height was similar *within*, but different *among*, plant functional types. We find  
61 drone-based photogrammetry allows for monitoring of AGB across large spatial extents and  
62 can advance understanding of understudied and vulnerable non-forested ecosystems across  
63 the globe.

64

65 **Keywords:**

66 Aboveground Biomass, Canopy Height Model, Structure-from-Motion Photogrammetry,  
67 Unmanned Aerial System (UAS), Drone, Allometry, Fine Resolution Remote Sensing, Plant  
68 Height.

## 69 Introduction

70 Non-forest ecosystems, dominated by shrub and herbaceous plants, cover about 70% of the  
71 Earth's land surface<sup>1</sup> and account for around 35% of all aboveground biomass (AGB)<sup>2</sup>. They  
72 provide multiple ecosystem services, playing dominant roles in the long-term trends and  
73 interannual variability of the global carbon cycle<sup>3,4</sup>, and are highly significant for grazing and  
74 agriculture<sup>5</sup>. Grassland, shrubland, Arctic tundra, savanna and proglacial montane  
75 landscapes are often more sensitive and respond faster to changes in climate than forests<sup>6</sup>,  
76 but have received less systematic research attention<sup>1,7,8</sup>. Non-destructive measurements of  
77 canopy height and biomass are fundamental requirements for plant science<sup>9-11</sup> to  
78 understand the roles of these ecosystems in climate change mitigation, sustainable food  
79 production and land management<sup>12-14</sup>. However, measuring biomass with *in situ*  
80 measurements is labour intensive and thus prone to undersampling, particularly in  
81 ecosystems that are spatially heterogeneous and/or temporally dynamic, putting on (and  
82 losing) biomass rapidly<sup>1,15-17</sup>. Gaps in available data mean that biomass dynamics are not  
83 being captured in many important ecosystems across the globe, hindering the calibration  
84 and validation of vegetation models and products derived from satellite observations<sup>7,14</sup>. The  
85 lack of accurate biomass data limits our ability to track changes and predict future responses  
86 in globally relevant non-forest ecosystems.

87

88 Improving the accuracy of biomass data in non-forest biomes requires approaches that are:  
89 (i) sensitive to small differences in AGB, (ii) sufficiently inexpensive to be adopted worldwide,  
90 and allow (iii) spatially continuous sampling across (iv) representative areas at (v) temporal  
91 frequencies appropriate for dynamic ecosystems<sup>14,16</sup>. The most accurate non-destructive  
92 estimates of AGB are generally obtained from *in situ* measurements of attributes such as  
93 plant cover, height and stem diameters, using allometric functions fitted to harvested  
94 biomass observations. Canopy volume, the product of height and cover, is often the  
95 strongest predictor of AGB for shrubs, herbs and other low-stature plants<sup>15,18-22</sup>. Remote-  
96 sensing approaches have been widely used to extend the coverage of biomass predictions.  
97 Biomass can be predicted from airborne LiDAR (Light Detection and Ranging) in shrublands  
98 and savannas<sup>23</sup>, but the footprints sampled by LiDAR can be insensitive to fine-scale  
99 changes in plant structure and these data are expensive and unavailable in many areas.  
100 Biomass estimates computed from spectral reflectance are often highly uncertain due to  
101 asymptotic relationships between AGB and surface reflectance and variable soil albedo<sup>6,22</sup>.  
102 Globally-available biomass products from space-based sensors such as LiDAR, synthetic-

103 aperture radar or vegetation optical depth are either insensitive and/or poorly calibrated and  
104 validated in low-biomass (<20 Mg ha<sup>-1</sup>) ecosystems<sup>1,7,8,14,24</sup>.

105

106 Photogrammetry using aerial images acquired with unmanned aerial systems (UAS, herein  
107 'drones') could greatly improve quantification of AGB in non-forest ecosystems, both directly  
108 at a local scale and indirectly by improving the calibration and validation of biomass products  
109 obtained from coarser scale remotely-sensed observations. Advances in photogrammetry,  
110 particularly structure-from-motion (SfM) with multi-view stereopsis<sup>25</sup>, have made it possible  
111 to capture 3D representations of plants, quantitatively describing their fine-scale structure  
112 with an unprecedented level of detail<sup>26,27</sup>. SfM allows objective measurements of canopy  
113 height at sub-decimetre spatial grain for a wide range of plant growth forms<sup>18–20,27–31</sup>.  
114 Lightweight and inexpensive drones enable vegetation sampling at temporal intervals  
115 appropriate for highly dynamic ecosystems<sup>16,32</sup> and can be used for detailed surveys over  
116 extents of 1-10 ha, covering more representative areas of heterogeneous ecosystems<sup>15,27</sup>  
117 that allow spatially explicit comparison with other biomass estimates<sup>1,14,32</sup>.

118

119 Fully realising the potential of drone photogrammetry in plant science requires reproducible  
120 workflows, which minimise biases<sup>30,33,34</sup>. Over the past few years, thousands of hectares of  
121 low-stature ecosystems have been surveyed with drones across the globe, yielding  
122 information-rich datasets. However, drone-photogrammetry products are sensitive to the  
123 ways in which data are (i) collected (e.g., ground sampling distance, image overlap, viewing  
124 geometry, spatial control, illumination conditions)<sup>27,30,34–38</sup>, (ii) processed (e.g., software, lens  
125 model, specification of control accuracy, selection of processing quality, depth filtering)<sup>27,36–  
126 38</sup>, and (iii) analysed (e.g., canopy height metrics, spatial grain and interpolation, statistical  
127 treatment)<sup>20,27–29,31</sup>. These sensitivities are more pronounced for subjects with complex  
128 texture, such as vegetation, and hinder comparisons between products obtained from  
129 different workflows. To maximise the value of these approaches, standardised and  
130 reproducible protocols are needed, but few efforts currently exist to advance this aim.  
131 Addressing critical knowledge gaps in plant science with drone photogrammetry requires  
132 knowledge of the relationships between photogrammetrically derived canopy height and  
133 AGB across the range of plants and ecosystems in which they will be applied, and  
134 systematic understanding of the possible influences of environmental conditions (e.g. wind  
135 speed and illumination)<sup>19,27,30,35,39</sup>. In this study, we apply a new, standardised approach for  
136 airborne allometric inference of biomass for non-forested ecosystems globally using drone

137 photogrammetry. We asked the following research questions: (1) Does canopy height  
138 derived from drone photogrammetry correspond with AGB at the species-level? (2) Does  
139 photogrammetry-derived canopy height correspond with AGB at the PFT-level? (3) Are  
140 relationships between reconstructed canopy height and biomass influenced by wind speed  
141 and (4) and solar elevation?

142

143 Using rigorous, consistent protocols<sup>33</sup>, we conducted a novel, globally coordinated  
144 experiment to sample 36 sites, encompassing a diverse range of non-forest ecosystems,  
145 including semi-arid and temperate grasslands and shrublands, Arctic tundra, savanna and  
146 proglacial montane sites (Fig. 1B), spanning from 71° North to 37° South, across North  
147 America, Europe, Australia and Africa (Fig. 1A). Our study includes photogrammetric  
148 reconstructions from 38 different surveys (Supplementary Table 1), sampling 50 low-stature  
149 plant species across six PFTs including ferns, forbs, graminoids, shrubs, succulents and  
150 trees that cover phylogenetic diversity including non-flowering plants and the most species-  
151 rich clades of flowering plants (including monocots and eudicots). To calibrate our allometric  
152 models, we sampled 741 harvest plots, with AGB ranging from 9 g m<sup>-2</sup> to 7,892 g m<sup>-2</sup> and  
153 mean (maximum) canopy heights ranging from 0 m to 1.9 m (0.01 m to 6.7 m). Our sample  
154 achieved a more than twenty-fold improvement in the coverage of harvest plots, species and  
155 sites compared to previous photogrammetry vegetation studies (Fig. 1C)<sup>20,28,29</sup>. We fitted  
156 plant functional type (PFT) and species-specific models that predict AGB from fine-grained  
157 canopy height as determined by SfM photogrammetry. Mean canopy height, sampled at fine  
158 (centimetre) spatial grain, integrated canopy cover and height as well as foliage density. The  
159 consideration of these multiple plant size attributes is key to robust prediction of biomass.



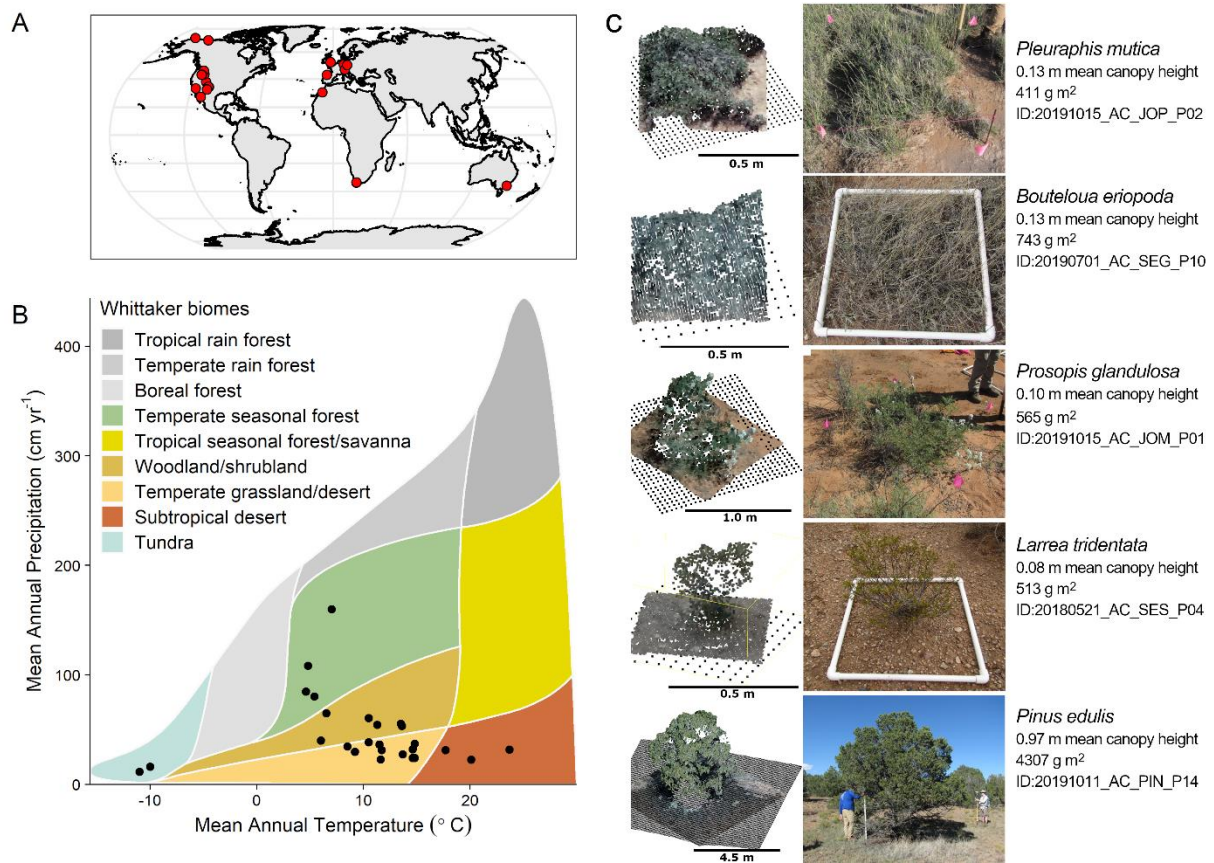

160

161 **Fig. 1. Point clouds derived from drone surveys consistently provided structural**  
162 **reconstructions of plants across non-forested ecosystems. A** depicts the geographic  
163 distribution of our sites, spanning four continents. **B** depicts the bioclimatic distribution of  
164 sites in terms of annual average precipitation and temperature. We sampled five biomes  
165 where low-stature vegetation is often dominant, representing every appropriate (non-forest)  
166 biome described by Whittaker<sup>40</sup>. **C** Reconstructed point clouds corresponded well with  
167 photographs of harvest plots. The grid of black points represents the underlying terrain  
168 model.

## 169 **Methods**

### 170 ***Site and Species selection***

171 We focused our efforts on low-stature phenotypes in non-forest ecosystems, including  
172 grasslands, shrublands with open and closed canopies, and woody savannas. Low-stature  
173 ecosystems are understudied and tools for quantifying forest biomass are better represented  
174 in the existing literature<sup>1,7,8</sup>. While photogrammetry can be used to characterise forest  
175 canopies<sup>30,31,35</sup>, we consider forest ecosystems better candidates for observation with active  
176 remote sensing approaches such as synthetic-aperture radar<sup>7</sup>, vegetation optical depth and  
177 LiDAR<sup>52</sup>. We selected species that were regionally widespread, accessible and would inform  
178 ongoing research efforts, but excluded extensively modified vegetation such as managed  
179 hedges. Sampling was undertaken during seasonal peak canopy cover to minimise  
180 differences arising from phenophase, although plant development and allometric  
181 relationships may still vary especially in more water-limited ecosystems<sup>41</sup>. The data  
182 collection protocol was comprehensively described by Cunliffe and Anderson<sup>33</sup>. Two study  
183 sites ('SES' and 'SEG') were sampled on consecutive years, giving 38 surveys from 36 sites  
184 (Supplementary Table 1).

### 185 ***Aerial imaging surveys***

186 Harvest sites were surveyed using drones to acquire aerial red-green-blue images. For each  
187 site, two sets of survey flights were undertaken, the first obtaining nadir imagery to attain a  
188 spatial grain of ca. 5 mm per pixel at the canopy top, and the second obtaining oblique (ca.  
189 20° from nadir) images from ca. 4 m higher. Survey altitudes varied depending on the  
190 resolution and field-of-view of the sensors and the canopy height<sup>30</sup>, but were typically 20 m  
191 above the canopy. The different perspectives afforded by the nadir and slightly higher,  
192 convergent surveys helps to improve the stability of the camera network<sup>36,37,45,53–56</sup>. Both  
193 survey flights obtained 75% forward and side overlap, together capturing at least 30 images  
194 for each part of the study area. The high image overlap facilitated tie point matching in the  
195 vegetated scenes. Wind speeds were generally recorded using handheld anemometers  
196 immediately prior to the survey<sup>47</sup>. Our sampling protocol<sup>33</sup> was optimised for smaller plants of  
197 up to ca. 3 m in height. To support feature matching in texturally complex scenes containing  
198 taller vegetation (e.g., mature *Juniperus monosperma* or *Pinus edulis*), higher survey  
199 altitudes could be used to help minimise excessive parallax (i.e., excessive scene changes  
200 between overlapping images).



201 A key requirement for photogrammetric surveys is the inclusion of adequate spatial  
202 control<sup>38,45</sup>. Our photogrammetric reconstructions used thirteen ground markers, each  
203 measuring ca. 20 cm x 20 cm, deployed across each site and geolocated to a typical  
204 precision of  $\pm 0.015$  m horizontally and  $\pm 0.03$  m vertically. Further details on the sites and  
205 survey equipment are provided in Supplementary Table 1. Images intended for  
206 photogrammetric analysis should ideally not be geometrically corrected in-camera prior to  
207 further distortion correction. Such in-camera processing is a problem for JPG-format image  
208 files from cameras like the widely used DJI Phantom 4 Advanced/Pro FC6310 camera, and  
209 so capturing RAW-format images can help avoid this error source<sup>38,45</sup>. We anticipate ongoing  
210 improvements to camera geolocation and orientation information from drone systems will  
211 continue to improve the accuracy and reliability of the camera parameter estimation,  
212 particularly in densely vegetated and thus texturally complex settings (Supplementary Note  
213 1)<sup>34,38,45,57,58</sup>.

#### 214 **Vegetation harvests**

215 We used an area-based approach to enable sampling in ecosystems with continuous or  
216 coalesced canopies, while also sampling individual plants where these were naturally  
217 isolated from other plants<sup>33,59</sup>. We selected harvest plots to sample across the natural range  
218 of canopy heights observed at each site, in order to estimate the allometric models more  
219 efficiently as well as to test the form of the relationship between mean canopy height and  
220 biomass<sup>46</sup>. Plots were chosen to try to ensure that  $\geq 90\%$  of the biomass and  $\geq 90\%$  of the  
221 foliar volume within each plot were from the target species. We aimed for a minimum harvest  
222 plot size of 0.5 m x 0.5 m to reduce the possible effects of co-registration errors<sup>22</sup>. The  
223 corners of each plot were geolocated with high-precision GNSS before all standing biomass  
224 was harvested to ground-level (or the moss level for *Salix richardsonii* and *Arctophila*  
225 *fulva*)<sup>22</sup>. Biomass was then dried at ca. 50-80°C until reaching a constant weight over a 24-  
226 hour period. For some of the largest taxa (*Adenostoma fasciculatum*, *Adenostoma*  
227 *sparsifolium*, *Atriplex polycarpa*, *Ericameria nauseosa*, *Juniperus monosperma*, *Launaea*  
228 *arborescens*, *Pinus edulis* and *Prosopis velutina*), freshly harvested biomass was weighed in  
229 the field and representative sub-samples were then dried to determine moisture contents<sup>59</sup>.  
230 Plot areas were computed from corner coordinates, unless a quadrat was used during  
231 harvesting in which case the area of the quadrat was used to minimise propagating errors  
232 from GNSS-coordinates.

#### 233 **Image-based modelling**

234 Aerial images were processed using SfM photogrammetry, using established workflows and  
235 following our previous studies<sup>27,59</sup>. Geotagged image data and ground-control marker  
236 coordinates were imported into AgiSoft PhotoScan Professional v1.4.3 (now Metashape;  
237 <http://www.agisoft.com>) and converted to UTM coordinate reference systems. Image  
238 sharpness was measured using PhotoScan's image quality tool, all images had an image  
239 sharpness score of  $\geq 0.5$ <sup>37</sup>. Tie points were matched and cameras aligned using  
240 PhotoScan's highest quality setting, a key point limit of 40,000, a tie point limit of 8,000, with  
241 generic and reference pair preselection enabled, and adaptive camera model fitting disabled.  
242 During camera self-calibration we enabled the following lens parameters: Focal length (f),  
243 principal point (cx, cy), radial distortion (k1, k2), tangential distortion (p1, p2), aspect ratio  
244 and skew coefficient (b1, b2). Most cameras had global shutters but rolling shutter  
245 corrections were used when appropriate. Reference parameters were set to: camera  
246 location accuracy =  $XY \pm 20$  m,  $Z \pm 50$  m; marker location accuracy =  $XY \pm 0.02$  m,  $Z \pm 0.05$   
247 m; marker projection accuracy was set to 2 pixels; tie point accuracy was set to either the  
248 mean root mean square reprojection error or one, whichever was greater. The result of  
249 camera alignment was a sparse point cloud that was then filtered and points with  
250 reprojection error above 0.45 pixels were excluded from further analysis. An operator  
251 reviewed the sparse point clouds and estimated camera positions to verify their plausibility.  
252 Any obviously erroneous tie points were removed manually. Geolocated markers were  
253 placed by an operator on ten projected images for each of the 13 ground control points. Ten  
254 of these markers were used to constrain the photogrammetric reconstructions spatially<sup>60</sup>,  
255 while the remaining three were used for independent evaluation of each reconstruction. The  
256 three markers used for accuracy assessment were deselected before the interior and  
257 exterior camera parameters were optimised. Any obviously implausible camera positions  
258 were refined after marker placement and optimisation. All cameras were usually aligned and  
259 used for multi-view stereopsis (dense point cloud generation), using the ultrahigh quality  
260 setting with mild depth filtering to preserve finer details of the vegetation<sup>27,29,30</sup>. For further  
261 discussion of some of the limitations of this approach, see Supplementary Note 1. Dense  
262 point clouds were exported in the laz format, with point coordinate and RGB attributes.

### 263 ***Digital terrain models***

264 An essential requirement for deriving canopy height models from photogrammetry-derived  
265 point clouds is a digital terrain model, which must be sufficiently accurate and detailed with  
266 respect to canopy heights and topographic complexity<sup>31</sup>. We used terrain models  
267 interpolated with Delaunay triangulation between the GNSS-observations of the harvest plot  
268 corners (Fig. 1C). In instances where plant canopies are discontinuous in space, suitable

269 terrain models may be extracted from the photogrammetric point cloud<sup>20,27</sup>. Other options  
270 can include extracting terrain models from photogrammetric drone surveys during leaf-off  
271 conditions (or post-harvest, if applicable), LiDAR surveys<sup>61</sup> or walkover surveys with GNSS  
272 instruments.

### 273 ***Calculation of canopy heights***

274 Point clouds were analysed with PDAL (v2.1.0)<sup>62</sup>. The point cloud representing each harvest  
275 plot was subset using the GNSS-observed corner coordinates. In a few instances where plot  
276 infrastructure (e.g., marker posts or flags) was visible in the point cloud (n=20 plots), these  
277 points were manually assigned to a noise class and excluded from canopy height  
278 calculations. Within each plot, the height-above-ground of each point was calculated relative  
279 to the terrain model and any points with a negative height-above-ground were set to  
280 zero<sup>20,27</sup>. Using a 0.01 m resolution grid, we calculated the maximum point height in each  
281 grid cell. For cells containing no points, we interpolated heights using inverse distance  
282 weighting considering an array of 7 × 7 cells using a power of one, and cells with no  
283 neighbouring points in that area remained empty. Plot-level mean canopy height was then  
284 extracted from this grid of local maxima elevations.

### 285 ***Statistical analysis***

286 Statistical analyses were conducted in R v3.6.1<sup>63</sup>. Sun elevations during each survey were  
287 computed with the Astral package<sup>64</sup>. We produced the climate space plot using the  
288 plotbiomes R package<sup>65</sup> based on the biomes described by Whittaker<sup>40</sup>. We excluded 13  
289 bryophyte plots from two rocky sites where we were unable to extract meaningful canopy  
290 height observations (Supplementary Fig. 5) and 16 graminoid plots from one grassland site  
291 ('WSP') that could not be reconstructed (Supplementary Fig. 6, Supplementary Note 1).

292 We used ordinary least squares regression to fit separate linear models predicting AGB  
293 observations from mean canopy height for each PFT and for each species with four or more  
294 observations. We considered ferns, forbs, graminoids, shrubs, trees and succulents as  
295 PFTs, and constrained the y-intercept to zero in order to ensure zero canopy height  
296 predicted zero biomass. Model performance was validated using leave-one-out cross-  
297 validation (LOOCV) to compute the mean out-of-sample prediction error, which was divided  
298 by the model slope to obtain relative errors for each model<sup>31,66</sup>.

299 To test the influence of wind speed on allometric functions, we fitted a generalised linear  
300 mixed model (GLMM) to predict total biomass as a function of canopy height and wind speed  
301 as fixed-effects and PFT as a random-effect based on a gamma error distribution with an

302 identity link function, using the 'lme4' package (v1.1-23)<sup>67</sup> (Supplementary Table 3).  
303 Succulents were excluded from this model because their inclusion prevented model  
304 convergence, possibly because this PFT had a much steeper slope between height:biomass  
305 (Table 1, Fig. 2) and/or because they may be less influenced by wind speed (Supplementary  
306 Fig. 2A). To illustrate the effect of wind speed, we used the 'ggeffects' package (v0.15)<sup>68</sup> to  
307 simulate the relationship between height and biomass for three levels of wind speed using  
308 the GLMM (Fig. 3A), and plotted the slope of biomass-height models ( $\pm 83\%$  confidence  
309 interval<sup>69</sup>) against wind speed at the PFT- (Supplementary Fig. 2A) and species-levels  
310 (Supplementary Fig. 3).

311 To test the influence of cloud cover on allometric functions, we fitted a linear mixed model  
312 (LMM) to predict total biomass as a function of canopy height, with PFT as a random-effect  
313 and cloud cover as fixed-effects, using the 'lmerTest' package (v3.1-2)<sup>70</sup> (Supplementary  
314 Table 4). Cloud cover was coded as a binary factor, with relatively clear sky (n=620) and  
315 cloudy conditions where the sun was obscured (n=80, sky codes  $\geq 6$  after<sup>71</sup>, Supplementary  
316 Table 6). To illustrate the effect of sun elevation, we simulated the modelled relationship  
317 between height and biomass for the two levels of cloud cover using the LMM  
318 (Supplementary Fig. 4).

319 To test the influence of sun elevation on allometric functions, we fitted a LMM to predict total  
320 biomass as a function of canopy height and sun elevation as fixed-effects and PFT as a  
321 random-effect, using the 'lmerTest' package (v3.1-2)<sup>70</sup> (Supplementary Table 5). We only  
322 included observations (n=620) collected under relatively clear sky conditions (sky codes  $\leq 5$ ,  
323 after<sup>71</sup>) when scene illumination was minimally modulated by clouds. To illustrate the effect  
324 of sun elevation, we simulated the modelled relationship between height and biomass for  
325 three levels of sun elevation using the LMM (Fig. 3B), and plotted the slope of biomass-  
326 height models ( $\pm 83\%$  confidence interval<sup>69</sup>) against sun elevation at the PFT-  
327 (Supplementary Fig. 3B) and species-level (Supplementary Fig. 5). There was insufficient  
328 replication to allow convergence of more complex model structures including species nested  
329 within PFT or site as random-effects. We evaluated diagnostics for all model visually using  
330 the R package 'performance' (v0.4.6)<sup>72</sup>.

## 331 **Results**

332 We found photogrammetrically measured mean canopy height was strongly predictive of  
333 AGB at the species-level. Linear models with a zero-intercept provided good approximations  
334 of the relationships between mean canopy height and AGB and are readily interpreted (Fig.  
335 2, Supplementary Fig. 1)<sup>22,31</sup>. The slopes from these models are equivalent to AGB density  
336 ( $\text{g m}^{-3}$ , calculated by dividing  $\text{g m}^{-2}$  by mean canopy height). Species-level densities ranged  
337 between  $375 \text{ g m}^{-3}$  to  $13,801 \text{ g m}^{-3}$  (Supplementary Fig. 1, Supplementary Table 2). Mean  
338 canopy height was an accurate predictor for individual species, especially when calibrated  
339 for specific ecophenotypic and phenological conditions<sup>15,31,41</sup>. Model goodness-of-fit was  
340 strong, with adjusted  $R^2$  values ranging from 0.46 to 0.99 with a mean of 0.83  
341 (Supplementary Fig. 1, Supplementary Table 2). Leave-one-out cross-validation indicated a  
342 mean prediction error of 7.4% (Supplementary Table 2). The high goodness-of-fits indicated  
343 the photogrammetric approach performed as well as widely used *in situ* allometric  
344 approaches at the species-level (Fig. 1, Table 1, Supplementary Fig. 1, Supplementary  
345 Table 2)<sup>15,22,41,42</sup>. Importantly, however, intensive drone surveys are relatively easy to  
346 conduct over larger spatial extents of several hectares. Using a carefully designed,  
347 standardised protocol<sup>33</sup> for acquiring and processing datasets yielded a good level of  
348 success in reconstructing 93% (688/741) of plots (Fig. 1C). The few instances where  
349 reconstructions were unsuccessful include mosses in rocky terrain, tall and dense grassland,  
350 and taller trees and shrubs ( $> 3 \text{ m}$ ) and are discussed in Supplementary Note 1. The  
351 similarities of the height-biomass relationships indicate this approach is generalisable across  
352 growth forms and environmental settings.

353

354 At the PFT-level, we found canopy height strongly predicted AGB across all six PFTs, with  
355 adjusted  $R^2$  ranging from 0.49 to 0.99 (Fig. 2, Table 1). For every 1-centimetre increase in  
356 mean canopy height, AGB increased by between 11 to  $115 \text{ g m}^{-2}$ , depending on PFT (Fig. 2,  
357 Table 1). Ferns had the lowest density ( $1,096 \text{ g m}^{-3}$ ), followed by forbs ( $1,191 \text{ g m}^{-3}$ ), then  
358 graminoids ( $2,898 \text{ g m}^{-3}$ ) and shrubs ( $3,214 \text{ g m}^{-3}$ ) with notably similar densities, then small  
359 trees ( $5,572 \text{ g m}^{-3}$ ) and lastly succulents had the largest density ( $11,532 \text{ g m}^{-3}$ ). Species-level  
360 model slopes were generally similar *within*, but different *between*, PFTs. The similarity of  
361 densities within PFTs indicates these relationships are generally transferrable between  
362 species within PFTs, particularly for the better sampled types such as graminoids and  
363 shrubs, although phenotypic and phenological variation will limit accuracy<sup>31,41</sup>. Should  
364 destructive harvests for local calibrations not be possible due to resource limitations or taxon

365 conservation status, the height-mass models described here could be used to non-  
366 destructively estimate AGB from similar drone-derived canopy height models (Table 1 and  
367 Supplementary Table 2). These allometric relationships were linear across the range of  
368 canopy height and biomass that we sampled, allowing their application from the whole plant-  
369 level to the ecosystem-level without necessarily requiring the discrete analysis of individual  
370 plants that can be challenging in ecosystems with coalesced canopies<sup>14,27,31,43</sup>.

371

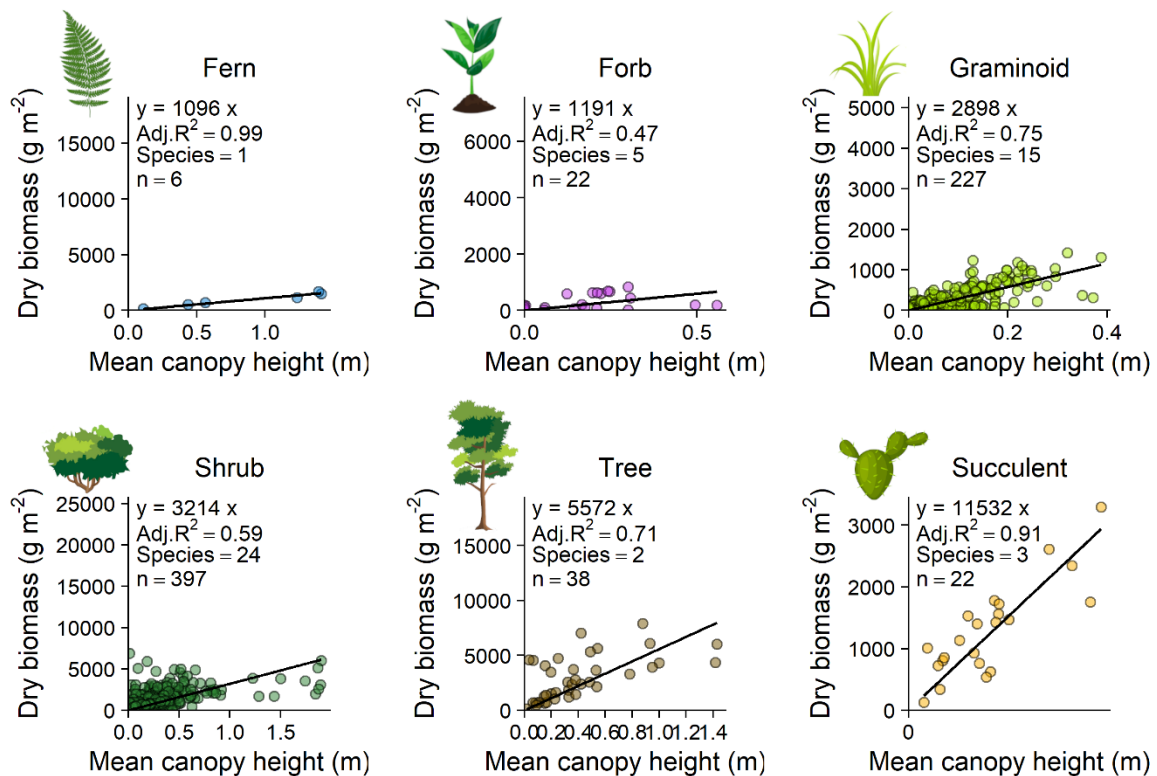

372

373 **Fig. 2. Photogrammetrically derived canopy height was a strong predictor of biomass**  
374 **within plant functional types.** A constant X:Y ratio was used for all plots, so model slopes  
375 can be compared visually even though axis ranges vary. Model slopes were generally similar  
376 within, but differed between, plant functional types. 'Species' indicates the number of species  
377 pooled for each plant functional type and black lines are linear models with intercepts  
378 constrained through the origin. Full model results are included in Table 1.



379 Table 1. Parameters for linear models fitted to each plant functional type. LOOCV is the  
 380 prediction error from Leave-One-Out Cross-Validation divided by the slope.

| Plant functional type | n   | n of surveys | Slope<br>$\text{g m}^{-2}$ | Residual standard error<br>$\text{g m}^{-2}$ | Adj. $R^2$ | t-statistic | P value | LOOCV<br>% |
|-----------------------|-----|--------------|----------------------------|----------------------------------------------|------------|-------------|---------|------------|
| Fern                  | 6   | 1            | 1,096                      | 53                                           | 0.99       | 20.558      | <0.0001 | 12.0       |
| Forb                  | 22  | 3            | 1,191                      | 262                                          | 0.47       | 4.534       | 0.0002  | 19.0       |
| Graminoid             | 227 | 17           | 2,898                      | 112                                          | 0.75       | 25.786      | <0.0001 | 3.7        |
| Shrub                 | 397 | 24           | 3,214                      | 134                                          | 0.59       | 23.823      | <0.0001 | 11.6       |
| Succulent             | 22  | 3            | 11,532                     | 760                                          | 0.91       | 15.159      | <0.0001 | 2.6        |
| Tree                  | 38  | 2            | 5,572                      | 577                                          | 0.71       | 9.654       | <0.0001 | 16.7       |

381

382 Wind speed negatively affected canopy heights reconstructed from photogrammetry (Fig.  
 383 3A, Supplementary Table 3, Supplementary Fig. 2, Supplementary Fig. 3, Supplementary  
 384 Note 2). We found the height-wind interaction parameter was strongly positive and highly  
 385 significant ( $p < 0.0001$ ) (Fig. 3A Supplementary, Table 3). This influence was seen at both  
 386 the PFT-level (Supplementary Fig. 2A) and species-level (Supplementary Fig. 3). Biomass  
 387 divided by height increased for surveys conducted in windier conditions, because the  
 388 movement of foliage meant lower mean canopy heights were reconstructed from images that  
 389 were acquired non-concurrently (see Supplementary Note 2 for extended discussion).  
 390 However, wind effects had only limited influence in our study because most of our plots were  
 391 surveyed in relatively light wind conditions (of  $< 4 \text{ m s}^{-1}$ ) (Supplementary Fig. 2A). We expect  
 392 sensitivity to wind speed differs between species because the effects of wind on foliage  
 393 motion depend on canopy architecture and mechanical properties like limb stiffness<sup>44</sup>  
 394 (Supplementary Fig. 3, Supplementary Note 2). Previous studies in forest settings have  
 395 reported contradictory effects of wind speed on canopy reconstructions<sup>30,35</sup>, but we think that  
 396 these differences are linked with the spatial grain of analysis. Our study demonstrates the  
 397 need to control for the influence of wind speed in future work particularly when surveying  
 398 low-stature plant canopies.

399

400 Sun elevation had no effect on allometric density and by extension reconstructed plant  
 401 height (Fig. 3B, Supplementary Fig. 2B, Supplementary Fig. 5, Supplementary Table 5).

402 Cloudy conditions appeared to have a notable effect on allometric density; however, the  
403 imbalance in observations under cloudy and clear conditions ( $n=80$  and  $n=620$ ,  
404 respectively), meant this effect was not considered reliable (Supplementary Table 4,  
405 Supplementary Fig. 4). As with wind, previous studies in forest settings reported  
406 contradictory effects of elevation on canopy reconstructions<sup>30,35</sup>. However, illumination  
407 conditions affect photogrammetry in complex ways<sup>37,45</sup>, with the influence of sun elevation  
408 depending on the distribution and intensity of shadows as well as the properties of the  
409 camera sensor and user choices during processing (see Supplementary Note 3 for extended  
410 discussion). When comparing findings regarding illumination effects, it is therefore necessary  
411 to consider the capabilities of the sensors and workflows employed and the structural  
412 complexities of the observed ecosystems. Our findings suggest that surveying under low  
413 wind speeds may be a higher priority than optimal illumination conditions for obtaining  
414 structural models of vegetation in low stature ecosystems.

415

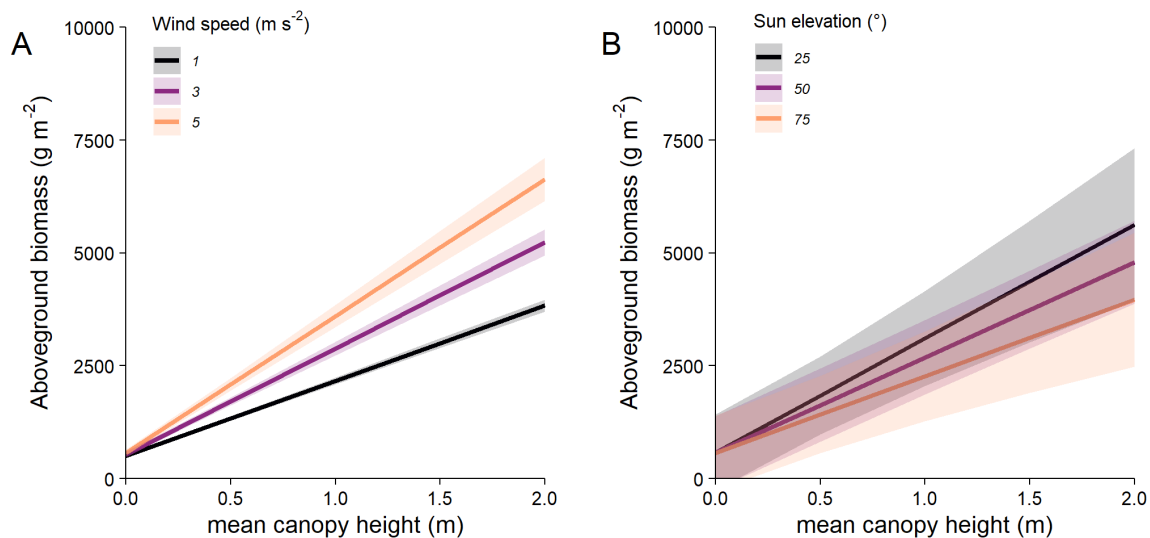

416

417 **Fig. 3. Reconstructed plant height and thus height-biomass relationships were**  
418 **systematically influenced by wind speed but were insensitive to illumination**

419 **conditions.** Mean predicted aboveground biomass variation over the range of observed  
420 mean canopy height, estimated for a range of three wind speeds and sun elevations. Wind  
421 speed has a statistically clear and positive effect on the relationship between height and  
422 biomass (A) (Supplementary Figs. 2A and 3, Supplementary Table 3), but sun elevation had  
423 no significant effect on the relationship between height and biomass (B) (Supplementary  
424 Figs. 2B and 5, Supplementary Table 5). Shaded areas represent 95% confidence intervals  
425 on the model predictions.

## 426 **Discussion**

427 We established accurate height-biomass relationships for non-forest vegetation using  
428 standardised drone photogrammetry protocols. Our findings enable observations that will  
429 provide new insights into ecosystem dynamics at previously understudied scales across  
430 non-forested ecosystems. Linear models have strong correspondence with observations at  
431 the species and PFT-levels across a diverse range of low-stature ecosystems and perform  
432 as well as conventional *in situ* allometric approaches reported in the literature (Table 1, Fig.  
433 2, Supplementary Table 2 and Supplementary Fig. 1). The similarity of graminoid and shrub  
434 PFT relationships indicate these could be applied together to estimate AGB in mixed  
435 ecosystems, without the need to individually classify these taxa, although there will be cases  
436 where allometric functions will need to be calibrated locally (Supplementary Note 4). As  
437 mean canopy height is readily compared between taxa, ecosystems and observation  
438 approaches<sup>14,22</sup>, these linear allometric relationships are straightforward to interpret<sup>46</sup> and  
439 can be easily integrated with landscape modelling frameworks. Drone photogrammetry is a  
440 relatively 'low-cost' (although see Supplementary Note 5) tool well suited for local-scale  
441 observation in non-forest ecosystems. The ease of surveying landscape scales of 1 to 10 ha  
442 is critical to advancing beyond existing *in situ* approaches and overcoming the gap between  
443 on-the-ground monitoring and the coarser grain of global-scale products derived from  
444 satellite-based remote sensing<sup>27,31</sup>. Accurate information at these intermediary scales is  
445 invaluable for validating models and testing the scaling of ecological relationships and  
446 biomass carbon estimates from plots to biomes<sup>6</sup>.

447

448 Addressing critical knowledge gaps in plant science with drone photogrammetry requires  
449 standardised protocols, such as those used here, because photogrammetry-derived models  
450 are sensitive to the ways in which data are collected<sup>27,30,35–38</sup>, processed<sup>27,36–38</sup>, and  
451 analysed<sup>20,27–29</sup>. These sensitivities can be more pronounced for subjects with complex  
452 texture, such as vegetation, and hinder comparisons between products obtained from  
453 different workflows. To date, what has been missing are systematic and reproducible  
454 demonstrations of how drone data can be used in real-world plant ecology research. Using  
455 standardised protocols, we established comparable height-biomass relationships for a wide  
456 range of low-stature plant species for the first time and enable investigation of how factors  
457 such as wind speed (Fig. 3A), illumination (Fig. 3B)<sup>35</sup>, or antecedent conditions<sup>41</sup> may  
458 influence allometric approaches. We show that it is important to account for the effects of  
459 wind speed during photogrammetric surveys beyond simply considering the effects of wind

460 on drone platforms. The most reproducible reconstructions will be obtained under 'zero' wind  
461 speeds<sup>30,35,37</sup>, but this is often not possible under real world operational conditions<sup>31,45,47</sup>. Our  
462 findings demonstrate that data will be most comparable when wind speeds are similar, but  
463 also that, where differences are unavoidable, it will be possible to derive corrections for how  
464 wind influences canopy reconstructions from drone photogrammetry. We call for the  
465 continued development of harmonised and community-based protocols to maximise  
466 knowledge gains and support cross-biome syntheses<sup>31,33,34,48</sup>.

467

468 Our findings show drone photogrammetry can yield informative canopy height models  
469 capable of detecting ecologically significant differences in AGB across a diverse range of  
470 low-stature ecosystems globally. Drones have considerable advantages as data collection  
471 platforms for ecological applications, including their relatively low cost, versatility in  
472 deployment allowing high temporal resolution monitoring, and capacity to record fine-grained  
473 and spatially explicit data<sup>34,45,49</sup>. Systematic and comparable observations of plant canopy  
474 structure and biomass are vital for calibrating and evaluating vegetation models and biomass  
475 products retrieved from globally-available remote sensing systems<sup>1,32,50,51</sup>. Drone data  
476 collection can broaden the scope of research and monitoring programmes to obtain more  
477 representative observations in vulnerable and understudied low-stature ecosystems.  
478 Photogrammetric approaches for monitoring canopy height and biomass provide novel tools  
479 that should be used more widely by the ecological research community to improve  
480 assessments of ecosystem change and global carbon budgets.

481

482

### 483 **Data availability**

484 Data collected for this publication, including aerial images, marker and plot coordinates, and  
485 dry sample weights, as well as site and survey metadata, are available from the NERC  
486 Environmental Information Data Centre (DOI: **<DATA DEPOSIT IN PROGRESS> -**  
487 **AVAILABLE ON REQUEST IF REQUIRED FOR REVIEW**). Code for photogrammetric  
488 processing and statistical analysis is available at [https://github.com/AndrewCunliffe/Global-](https://github.com/AndrewCunliffe/Global-Drone-Allometry)  
489 [Drone-Allometry](https://github.com/AndrewCunliffe/Global-Drone-Allometry)>.

490 **References**

- 491 1. Duncanson, L. *et al.* The importance of consistent global forest aboveground biomass  
492 product validation. *Surv Geophys* **40**, 979–999 (2019).
- 493 2. Liu, Y. Y. *et al.* Recent reversal in loss of global terrestrial biomass. *Nature Climate*  
494 *Change* **5**, 470–474 (2015).
- 495 3. Ahlström, A. *et al.* The dominant role of semi-arid ecosystems in the trend and variability  
496 of the land CO<sub>2</sub> sink. *Science* **348**, 895–899 (2015).
- 497 4. Poulter, B. *et al.* Contribution of semi-arid ecosystems to interannual variability of the  
498 global carbon cycle. *Nature* **509**, 600–603 (2014).
- 499 5. Asner, G. P., Elmore, A. J., Olander, L. P., Martin, R. E. & Harris, A. T. Grazing Systems,  
500 Ecosystem Responses, and Global Change. *Annual Review of Environment and*  
501 *Resources* **29**, 261–299 (2004).
- 502 6. Myers-Smith, I. H. *et al.* Complexity revealed in the greening of the Arctic. *Nat. Clim.*  
503 *Chang.* **10**, 106–117 (2020).
- 504 7. McNicol, I. M., Ryan, C. M. & Mitchard, E. T. A. Carbon losses from deforestation and  
505 widespread degradation offset by extensive growth in African woodlands. *Nature*  
506 *Communications* **9**, 3045 (2018).
- 507 8. Sleeter, B. M. *et al.* Effects of contemporary land-use and land-cover change on the  
508 carbon balance of terrestrial ecosystems in the United States. *Environ. Res. Lett.* **13**,  
509 045006 (2018).
- 510 9. Meilhac, J., Deschamps, L., Maire, V., Flajoulot, S. & Litrico, I. Both selection and  
511 plasticity drive niche differentiation in experimental grasslands. *Nat. Plants* **6**, 28–33  
512 (2020).
- 513 10. Meilhac, J., Durand, J.-L., Beguier, V. & Litrico, I. Increasing the benefits of species  
514 diversity in multispecies temporary grasslands by increasing within-species diversity.  
515 *Ann Bot* **123**, 891–900 (2019).

- 516 11. Myers-Smith, I. H. *et al.* Eighteen years of ecological monitoring reveals multiple lines of  
517 evidence for tundra vegetation change. *Ecol. Monogr.* **89**, (2019).
- 518 12. Harper, A. B. *et al.* Land-use emissions play a critical role in land-based mitigation for  
519 Paris climate targets. *Nat Commun* **9**, 1–13 (2018).
- 520 13. Griscom, B. W. *et al.* Natural climate solutions. *PNAS* **114**, 11645–11650 (2017).
- 521 14. Bartsch, A. *et al.* Feasibility of tundra vegetation height retrieval from Sentinel-1 and  
522 Sentinel-2 data. *Remote Sensing of Environment* **237**, 111515 (2020).
- 523 15. Huenneke, L. F., Clason, D. & Muldavin, E. Spatial heterogeneity in Chihuahuan Desert  
524 vegetation: implications for sampling methods in semi-arid ecosystems. *Journal of Arid*  
525 *Environments* **47**, 257–270 (2001).
- 526 16. Shriver, R. K. Quantifying how short-term environmental variation leads to long-term  
527 demographic responses to climate change. *Journal of Ecology* **104**, 65–78 (2016).
- 528 17. Schimel, D. *et al.* Observing terrestrial ecosystems and the carbon cycle from space.  
529 *Glob Change Biol* **21**, 1762–1776 (2015).
- 530 18. Bendig, J. *et al.* Estimating Biomass of Barley Using Crop Surface Models (CSMs)  
531 Derived from UAV-Based RGB Imaging. *Remote Sensing* **6**, 10395–10412 (2014).
- 532 19. Kröhnert, M. *et al.* Watching grass grow - a pilot study on the suitability of  
533 photogrammetric techniques for quantifying change in aboveground biomass in  
534 grassland experiments. in *ISPRS - International Archives of the Photogrammetry,*  
535 *Remote Sensing and Spatial Information Sciences* vol. XLII-2 539–542 (Copernicus  
536 GmbH, 2018).
- 537 20. Grüner, E., Astor, T. & Wachendorf, M. Biomass prediction of heterogeneous temperate  
538 grasslands using an SfM approach based on UAV imaging. *Agronomy* **9**, 54 (2019).
- 539 21. Wijesingha, J., Moeckel, T., Hensgen, F. & Wachendorf, M. Evaluation of 3D point cloud-  
540 based models for the prediction of grassland biomass. *International Journal of Applied*  
541 *Earth Observation and Geoinformation* **78**, 352–359 (2019).
- 542 22. Cunliffe, A. M., Assmann, J., Daskalova, G., Kerby, J. T. & Myers-Smith, I. H.  
543 Aboveground biomass corresponds strongly with drone-derived canopy height but



- 544 weakly with greenness (NDVI) in a shrub tundra landscape. *Environmental Research*  
545 *Letters* (2020) doi:10.1088/1748-9326/aba470.
- 546 23. Greaves, H. E. Applying Lidar and High-Resolution Multispectral Imagery for Improved  
547 Quantification and Mapping of Tundra Vegetation Structure and Distribution in the  
548 Alaskan Arctic. (University of Idaho, 2017).
- 549 24. Dubayah, R. *et al.* The Global Ecosystem Dynamics Investigation: high-resolution laser  
550 ranging of the Earth's forests and topography. *Science of Remote Sensing* 100002  
551 (2020) doi:10.1016/j.srs.2020.100002.
- 552 25. Westoby, M. J., Brasington, J., Glasser, N. F., Hambrey, M. J. & Reynolds, J. M.  
553 'structure-from-motion' photogrammetry: A low-cost, effective tool for geoscience  
554 applications. *Geomorphology* **179**, 300–314 (2012).
- 555 26. Dandois, J. P. & Ellis, E. C. High spatial resolution three-dimensional mapping of  
556 vegetation spectral dynamics using computer vision. *Remote Sensing of Environment*  
557 **136**, 259–276 (2013).
- 558 27. Cunliffe, A. M., Brazier, R. E. & Anderson, K. Ultra-fine grain landscape-scale  
559 quantification of dryland vegetation structure with drone-acquired structure-from-motion  
560 photogrammetry. *Remote Sens. Environ.* **183**, 129–143 (2016).
- 561 28. Wallace, L., Hillman, S., Reinke, K. & Hally, B. Non-destructive estimation of above-  
562 ground surface and near-surface biomass using 3D terrestrial remote sensing  
563 techniques. *Methods in Ecology and Evolution* **8**, 1607–1616 (2017).
- 564 29. Lussem, U. *et al.* Estimating biomass in temperate grassland with high resolution canopy  
565 surface models from UAV-based RGB images and vegetation indices. *JARS* **13**, 034525  
566 (2019).
- 567 30. Frey, J. *et al.* UAV Photogrammetry of Forests as a Vulnerable Process. A Sensitivity  
568 Analysis for a Structure from Motion RGB-Image Pipeline. *Remote Sensing* **10**, 912  
569 (2018).

- 570 31. Poley, L. & McDermid, G. A systematic review of the factors influencing the estimation of  
571 vegetation aboveground biomass using unmanned aerial systems. *Remote Sensing* **12**,  
572 1052 (2020).
- 573 32. Bouvet, A. *et al.* An above-ground biomass map of African savannahs and woodlands at  
574 25m resolution derived from ALOS PALSAR. *Remote Sensing of Environment* **206**, 156–  
575 173 (2018).
- 576 33. Cunliffe, A. & Anderson, K. Measuring Above-ground Biomass with Drone  
577 Photogrammetry: Data Collection Protocol. *Protocol Exchange* (2019)  
578 doi:10.1038/protex.2018.134.
- 579 34. Tmušić, G. *et al.* Current Practices in UAS-based Environmental Monitoring. *Remote*  
580 *Sensing* **12**, 1001 (2020).
- 581 35. Dandois, J. P., Olano, M. & Ellis, E. C. Optimal altitude, overlap, and weather conditions  
582 for computer vision UAV estimates of forest structure. *Remote Sensing* **7**, 13895–13920  
583 (2015).
- 584 36. James, M. R. & Robson, S. Mitigating systematic error in topographic models derived  
585 from UAV and ground-based image networks. *Earth Surf. Process. Landforms* **39**, 1413–  
586 1420 (2014).
- 587 37. Mosbrucker, A. R., Major, J. J., Spicer, K. R. & Pitlick, J. Camera system considerations  
588 for geomorphic applications of SfM photogrammetry. *Earth Surface Processes and*  
589 *Landforms* **42**, 969–986 (2017).
- 590 38. James, M. R., Antoniazza, G., Robson, S. & Lane, S. N. Mitigating systematic error in  
591 topographic models for geomorphic change detection: Accuracy, precision and  
592 considerations beyond off-nadir imagery. *Earth Surface Processes and Landforms*  
593 (2020) doi:10.1002/esp.4878.
- 594 39. Pätzig, M., Geiger, F., Rasche, D., Rauneker, P. & Eltner, A. Allometric relationships for  
595 selected macrophytes of kettle holes in northeast Germany as a basis for efficient  
596 biomass estimation using unmanned aerial systems (UAS). *Aquatic Botany* **162**, 103202  
597 (2020).

- 598 40. Whittaker, R. H. *Communities and Ecosystems*. (MacMillan Publishing Co, 1975).
- 599 41. Rudgers, J. A. *et al.* Sensitivity of dryland plant allometry to climate. *Functional Ecology*  
600 **32**, 2290–2303 (2019).
- 601 42. Muldavin, E. H., Moore, D. I., Collins, S. L., Wetherill, K. R. & Lightfoot, D. C.  
602 Aboveground net primary production dynamics in a northern Chihuahuan Desert  
603 ecosystem. *Oecologia* **155**, 123–132 (2008).
- 604 43. Krofcheck, D., Litvak, M., Lippitt, C. & Neuenschwander, A. Woody Biomass Estimation  
605 in a Southwestern U.S. Juniper Savanna Using LiDAR-Derived Clumped Tree  
606 Segmentation and Existing Allometries. *Remote Sensing* **8**, 453 (2016).
- 607 44. Rowe, N. & Speck, T. Plant growth forms: an ecological and evolutionary perspective.  
608 *New Phytologist* **166**, 61–72 (2005).
- 609 45. Aber, J. S., Marzloff, I., Ries, J. & Aber, S. W. *Small Format Aerial Photography and UAS*  
610 *imagery: Principles, techniques and geoscience applications*. (Elsevier, 2019).
- 611 46. Warton, D. I., Wright, I. J., Falster, D. S. & Westoby, M. Bivariate linefitting methods for  
612 allometry. *Biological Reviews* 259–291 (2006).
- 613 47. Duffy, J. P. *et al.* Location, location, location: considerations when using lightweight  
614 drones in challenging environments. *Remote. Sens. Ecol. Conserv.* **4**, 7–19 (2017).
- 615 48. Pérez-Harguindeguy, N. *et al.* New handbook for standardised measurement of plant  
616 functional traits worldwide. *Aust. J. Bot.* **61**, 167–234 (2013).
- 617 49. Anderson, K. & Gaston, K. J. Lightweight unmanned aerial vehicles (UAVs) will  
618 revolutionise spatial ecology. *Frontiers in Ecology and Environment* **11**, 138–146 (2013).
- 619 50. Tian, F. *et al.* Remote sensing of vegetation dynamics in drylands: Evaluating vegetation  
620 optical depth (VOD) using AVHRR NDVI and in situ green biomass data over West  
621 African Sahel. *Remote Sensing of Environment* **177**, 265–276 (2016).
- 622 51. Rodríguez-Fernández, N. J. *et al.* An evaluation of SMOS L-band vegetation optical  
623 depth (L-VOD) data sets: high sensitivity of L-VOD to above-ground biomass in Africa.  
624 *Biogeosciences* **15**, 4627–4645 (2018).

- 625 52. Herold, M. *et al.* The role and need for space-based forest biomass-related  
626 measurements in environmental management and policy. *Surv Geophys* **40**, 757–778  
627 (2019).
- 628 53. Luhmann, T., Fraser, C. & Maas, H.-G. Sensor modelling and camera calibration for  
629 close-range photogrammetry. *ISPRS Journal of Photogrammetry and Remote Sensing*  
630 **115**, 37–46 (2016).
- 631 54. James, M. R., Robson, S., d’Oleire-Oltmanns, S. & Niethammer, U. Optimising UAV  
632 topographic surveys processed with structure-from-motion: Ground control quality,  
633 quantity and bundle adjustment. *Geomorphology* **280**, 51–66 (2017).
- 634 55. Hendrickx, H. *et al.* The reproducibility of SfM algorithms to produce detailed Digital  
635 Surface Models: the example of PhotoScan applied to a high-alpine rock glacier.  
636 *Remote Sensing Letters* **10**, 11–20 (2019).
- 637 56. Nesbit, P. R. & Hugenholtz, C. H. Enhancing UAV-SfM 3D model accuracy in high-relief  
638 landscapes by incorporating oblique images. *Remote Sensing* **11**, undefined-undefined  
639 (2019).
- 640 57. Chudley, T. R., Christoffersen, P., Doyle, S. H., Abellan, A. & Snooke, N. High-accuracy  
641 UAV photogrammetry of ice sheet dynamics with no ground control. *The Cryosphere* **13**,  
642 955–968 (2019).
- 643 58. Zhang, H. *et al.* Evaluating the potential of post-processing kinematic (PPK)  
644 georeferencing for UAV-based structure- from-motion (SfM) photogrammetry and  
645 surface change detection. *Earth Surface Dynamics* **7**, 807–827 (2019).
- 646 59. Cunliffe, A. M. *et al.* Allometric relationships for predicting aboveground biomass and  
647 sapwood area of Oneseed Juniper (*Juniperus monosperma*) trees. *Front. Plant Sci.* **11**,  
648 (2020).
- 649 60. Ribeiro-Gomes, K., Hernandez-Lopez, D., Ballesteros, R. & Moreno, M. A. Approximate  
650 georeferencing and automatic blurred image detection to reduce the costs of UAV use in  
651 environmental and agricultural applications. *Biosystems Engineering* **151**, 308–327  
652 (2016).

- 653 61. Wilke, N. *et al.* Quantifying lodging percentage and lodging severity using a UAV-based  
654 canopy height model combined with an objective threshold approach. *Remote Sensing*  
655 **11**, 515 (2019).
- 656 62. PDAL Contributors. *PDAL Point Data Abstraction Library*. (2020).
- 657 63. R Core Team. *R: A language and environment for statistical computing*. (R Foundation  
658 for Statistical Computing, 2019).
- 659 64. Kennedy, S. *Astral*. (2020).
- 660 65. Stefan, V. *plotbiomes: Plot Whittaker biomes with ggplot2*. (2018).
- 661 66. Alfons, A. *cvTools*. (2015).
- 662 67. Bates, D., Mächler, M., Bolker, B. & Walker, S. Fitting Linear Mixed-Effects Models  
663 Using {lme4}. *Journal of Statistical Software* **67**, 1–48 (2015).
- 664 68. Lüdecke, D. & Aust, F. *ggeffects*. (2020).
- 665 69. Krzywinski, M. & Altman, N. Error bars. *Nature Methods* **10**, 921–922 (2013).
- 666 70. Kuznetsova, A., Brockhoff, P. B., Christensen, R. & Jensen, S. *ImerTest*. (2020).
- 667 71. Assmann, J. J., Kerby, J. T., Cunliffe, A. M. & Myers-Smith, I. H. Vegetation monitoring  
668 using multispectral sensors - best practices and lessons learned from high latitudes.  
669 *Journal of Unmanned Vehicle Systems* 334730 (2018) doi:10.1101/334730.
- 670 72. Lüdecke, D., Makowski, D., Waggoner, P. & Patil, I. *performance*. (2020).
- 671

## 672 **Acknowledgements**

673 We acknowledge funding support from NERC (NE/R00062X/1) awarded to R.E.B., A.M.C.,  
674 K.A., S.S., NERC (NE/M016323/1) awarded to I.H.M.-S., NERC GEF (NERC/GEF:1063 and  
675 1069) to I.H.M.-S. and A.M.C., U.S. Geological Survey Land Change Science Program  
676 awarded to M.L.V., NSF Graduate Research Internship Program (GRIP) awarded to C.A.H.,  
677 USDA McIntire-Stennis project awarded to J.W.K., University of Cape Town award to S.C.P.,  
678 J.S. and M.D.C., USDA Agricultural Research Service, GESFIRE (AGL2013-48189-C2-1-R),  
679 FIRESEVES (AGL2017-86075-C2-1-R), FIRECYL (LE033U14) and SEFIRECYL  
680 (LE001P17) awarded to J.M.F.-G., L.C. and S.S.-S. FPU16/03070 awarded to J.M.F.-G. ,  
681 NSF (#1836861), NASA ABoVE award number: NNX17AC58A, EU Horizon 2020 grant No.  
682 776681 (PHUSICOS), Czech University of Life Sciences to J.P.; Jornada LTER (NSF  
683 1832194), Australian Research Council (LP180100741) to M.L., National Council For  
684 Science And Technology to L.A.M.-B., Deutsche Forschungsgemeinschaft DFG (MA 2549/6-  
685 1 and RI 835/24-1) to I.M. and M.K. and the NSW Department of Industry (NCRIS co-funding  
686 of Terrestrial Ecosystem Research Network – Cumberland Plain Supersite) to M.M.B and  
687 A.G. We thank the following entities for permission to conduct sampling on their properties:  
688 Kelly Young, Deer Canyon Preserve, Drie Kuilen Nature Reserve, Département des Eaux et  
689 Forêts Maroc, Idaho Department of Fish and Game, Jornada LTER and ARS (Study number  
690 545), Leroy Humphries, Nature Conservation Agency of the Czech Republic, Penrith  
691 Whitewater Stadium, SDSU Research Foundation, Seville National Wildlife Refuge, The  
692 Idaho Chapter of The Nature Conservancy, USDI Bureau of Land Management, Utqiagvik  
693 Inupiat Corporation, Worcester County Council, Natural England, Yukon Government and  
694 Parks (Permit: Inu-02-16) and The Inuvialuit People. We thank the following people for their  
695 assistance with data collection: Aaron Sobel, Alex Boehm, Alex Traynor, Andrew Corrales,  
696 Barbara Pachler, Ben Porter, Ben Spectre, Bobby Mullen, C. Wade Ross, Chad Radford,  
697 Craig McNamara, Danielle Lara, Dominic Fawcett, Eleanor Walker, Eric Spangler, Gerald  
698 Griesebner, Gerardo Armendariz, Haydn Thomas, James Atkins, Jason Wong, John  
699 Anderson, John Godlee, John Smith, Jordan Johnston, Julio Cenicerros, Julius Anchang,  
700 Justin Van Zee, Karen Anderson, Kathryn Fuller, Lara Prihodk, Mariana Orejel, Martin  
701 Barnett, Nick Smith, Qiuyan Yu, Ross Bryant, Roxanne Chepsongol, Sandra Angers-  
702 Blondin, Santeri Lehtonen, Seth Hall, Stephanie Baker, Travis Whitehead, Ulrich Zangerl,  
703 William Gentry and Zachary Winston. Any use of trade, firm, or product names is for  
704 descriptive purposes only and does not imply endorsement by the U.S. Government. The  
705 authors acknowledge the support of the University of Exeter’s High-Performance Computing  
706 (HPC) facility in conducting this study, and Tim Hill and Toby Pennington for useful  
707 discussions.



708 **ORCIDs**

709 A.M.C.: 0000-0002-8346-4278, K.A.: 0000-0002-3289-2598, F.B.: 0000-0002-7612-3264,  
710 H.A.G.: 0000-0001-9451-5010, R.E.B.: 0000-0002-8715-0399, I.H.M.-S.: 0000-0002-8417-  
711 6112, T.A.: 0000-0003-4608-955X, M.M.B.: 0000-0001-6362-4572, L.C.: 0000-0003-3710-  
712 0817, P.E.C.: 0000-0003-4299-1853, M.D.C.: 0000-0003-0989-3266, M.S.E.-L.: 0000-0002-  
713 0541-3053, S.M.E.: 0000-0002-7246-2795, J.M.F.-G.: 0000-0002-6065-3981, A.G.F.: 0000-  
714 0002-6903-8053, K.G.: 0000-0002-6943-9172, B.M.G.: 0000-0003-1464-3747, A.G.: 0000-  
715 0002-4476-8279, N.P.H.: 0000-0002-9130-5306, M.S.H.: 0000-0001-7275-9145, S.H.: 0000-  
716 0002-5702-4236, C.A.H.: 0000-0003-3913-0980, P.H.: 0000-0002-1073-4564, W.J.: 0000-  
717 0003-2554-4373, J.W.K.: 0000-0002-3326-3806, M.K.: 0000-0001-8773-8005, S.K.: 0000-  
718 0001-8849-8162, M.B.L.: 0000-0003-3960-3522, I.M.: 0000-0002-0917-4336, M.E.M.: 0000-  
719 0001-8733-9119, C.D.M.: 0000-0001-9666-5805, D.M.: 0000-0002-0330-8698, L.A.M.-B.:  
720 0000-0001-7467-5498, S.C.P.: 0000-0001-6310-0146, J.P.: 0000-0001-9982-2730, E.S.-A.:  
721 0000-0001-9975-5726, K.J.S.: 0000-0002-2153-8534, D.S.-B.: 0000-0001-8215-975X, P.S.:  
722 0000-0003-2480-1171, S.S.: 0000-0003-1821-8561, J.S.: 0000-0001-8664-8059, C.S.:  
723 0000-0003-3480-3023, S.S.-S.: 0000-0001-7656-4214, S.A.V.: 0000-0002-0052-8580,  
724 M.L.V.: 0000-0003-0720-1422, F.V.: 0000-0001-6042-9341, M.W.: 0000-0002-2840-7086,  
725 H.W.: 0000-0003-1777-5067, R.W.: 0000-0001-8496-3514

726

727 **Author contributions**

728 A.M.C. conceived the research idea, administered the project, curated the data, did the data  
729 visualisation and led the writing of the manuscript. A.M.C. and K.A. developed the  
730 experimental design. A.M.C., K.A., R.E.B., I.H.M.-S., M.M.B., P.E.C., M.D.C., J.M.F.-G.,  
731 A.G., N.P.H., C.A.H., P.H., J.W.K., I.M., L.A.M.-B., S.C.P., J.P., S.S., J.S., S.A.V. and M.L.V.  
732 acquired funding. A.M.C., K.A., F.B., R.E.B., I.H.M.-S., T.A., M.M.B., L.C., P.E.C., M.D.C.,  
733 M.S.E.-L., S.M.E., J.M.F.-G., A.G.F., K.G., B.M.G., A.G., N.P.H., M.S.H., S.H., C.A.H., P.H.,  
734 W.J., J.W.K., M.K., S.K., M.B.L., I.M., M.E.M., C.D.M., D.M., L.A.M.-B., S.C.P., J.P., E.S.-A.,  
735 K.J.S., D.S.-B., P.S., S.S., J.S., C.S., S.S.-S., S.A.V., M.L.V., F.V., M.W., H.W. and R.W.  
736 undertook the investigation. A.M.C. and H.A.G. developed the processing program. A.M.C.,  
737 I.H.M.-S. and H.A.G. performed the analysis. All authors contributed to the final version of  
738 the manuscript.

739

740 **Competing interests**

741 The authors declare no competing financial interests.
